# Supplementary material
Source: publisher site journal article supplement (https://www.dovepress.com/get_supplementary_file.php?f=262879.docx)
Supplement: Supplementary file 1 [file get_supplementary_file.php]

# Supplementary Data

# Probes Identification

Supplementary Table-1 describes the identification of TaqMan probes that were used to evaluate the gene expression of markers and inflammatory receptors in the liver, intestinal permeability and circulating microRNAs.

| **Supplementary Table-1:** Probes identification | |
| --- | --- |
| **Assay Name** | **Assay ID** |
| Mediators and hepatic inflammatory receptors | |
| *Il6* | Rn01410330_m1 |
| *Il10* | Rn00563409_m1 |
| *Tnfa* | Rn00562055_m1 |
| *Il18* | Rn01422083_m1 |
| *Il1b* | Rn00580432_m1 |
| *Myd88* | Rn01640049_m1 |
| *Tlr4* | Rn00569848_m1 |
| *Tlr2* | Rn02133647_s1 |
| *Tlr9* | Rn01640054_m1 |
| *Ppara* | Rn00566193_m1 |
| *Casp1* | Rn00562724_m1 |
| *Nlrp3* | Rn04244620_m1 |
| Gut permeability markers | |
| *Cldn1* | Rn00581740_m1 |
| *Cldn4* | Rn01196224_s1 |
| *Ocln* | Rn00580064_m1 |
| *F11r* | Rn00587389_m1 |
| *Actb* | Rn00667869_m1 |
| microRNAs | |
| rno-miR-122-5p | 002245 |
| mmu-miR-143-5p | 463509_mat |
| hsa-miR-145-5p | 002278 |
| cel-miR-39-3p | 000200 |
